# Supplementary material
Source: PubMed Central journal article supplement (PMC4996029)
Supplement: mnp-0001-0175-s01.pdf [file mnp-0001-0175-s01.pdf]

| <b>Amplicon</b> | <b>MAQ Assay</b> | <b>Amplicon Size (bp)</b> | <b>Chromosome</b> | <b>Start</b> | <b>Stop</b> |
|-----------------|------------------|---------------------------|-------------------|--------------|-------------|
| PDE4B-amp1      | 1                | 195                       | 1                 | 66038008     | 66038195    |
| PDE4B-amp2      | 1                | 114                       | 1                 | 66197677     | 66197783    |
| PDE4B-amp3      | 1                | 431                       | 1                 | 66272749     | 66273172    |
| PDE4B-amp4      | 2                | 124                       | 1                 | 66286323     | 66286439    |
| PDE4B-amp5      | 1                | 438                       | 1                 | 66359460     | 66359890    |
| PDE4B-amp6      | 2                | 136                       | 1                 | 66368320     | 66368448    |
| PDE4B-amp7      | 1                | 100                       | 1                 | 66445939     | 66446031    |
| PDE4B-amp8      | 1                | 338                       | 1                 | 66524106     | 66524436    |
| PDE4B-amp9      | 1                | 288                       | 1                 | 66603327     | 66603607    |
| DISC1-amp1      | 2                | 334                       | 1                 | 229622813    | 229623139   |
| DISC1-amp2      | 2                | 342                       | 1                 | 229710227    | 229710561   |
| DISC1_newamp1   | 3                | 265                       | 1                 | 229758951    | 229759208   |
| DISC1_newamp2   | 3                | 231                       | 1                 | 229774422    | 229774645   |
| DISC1_newamp3   | 3                | 105                       | 1                 | 229781820    | 229781917   |
| DISC1_newamp4   | 3                | 120                       | 1                 | 229790073    | 229790185   |
| DISC1-amp3      | 2                | 329                       | 1                 | 229793461    | 229793782   |
| DISC1-amp4      | 1                | 174                       | 1                 | 229813156    | 229813322   |
| DISC1-amp5      | 2                | 308                       | 1                 | 229814616    | 229814916   |
| DISC1-amp6      | 2                | 248                       | 1                 | 229845119    | 229845359   |
| DISC1-amp7      | 2                | 185                       | 1                 | 229865910    | 229866087   |
| DISC1-amp8      | 1                | 272                       | 1                 | 229869607    | 229869871   |
| DISC1_newamp5   | 3                | 311                       | 1                 | 229879115    | 229879418   |
| DISC1_newamp6   | 3                | 176                       | 1                 | 229880460    | 229880628   |
| DISC1_newamp7   | 3                | 202                       | 1                 | 22988200     | 229882194   |
| DISC1_newamp8   | 3                | 223                       | 1                 | 229891380    | 229891595   |
| PDE4B-amp9      | 2                | 180                       | 1                 | 229894792    | 229894964   |
| PDE4B-amp10     | 1                | 239                       | 1                 | 229927074    | 229927305   |
| PDE4B-amp11     | 1                | 144                       | 1                 | 229977379    | 229977515   |
| PDE4B-amp12     | 1                | 414                       | 1                 | 230038716    | 230039122   |
| PDE4B-amp13     | 1                | 227                       | 1                 | 230153028    | 230153247   |
| PDE4B-amp14     | 1                | 277                       | 1                 | 230210878    | 230211147   |
| PDE4B-amp15     | 1                | 233                       | 1                 | 230261916    | 230262141   |
| FEZ1-amp1       | 1                | 136                       | 11                | 124823616    | 124823744   |
| FEZ1-amp2       | 2                | 169                       | 11                | 124831687    | 124831848   |
| FEZ1-amp3       | 2                | 263                       | 11                | 124835695    | 124835950   |
| FEZ1-amp4       | 1                | 244                       | 11                | 124839082    | 124839318   |
| FEZ1-amp5       | 2                | 224                       | 11                | 124839999    | 124840215   |
| FEZ1-amp6       | 1                | 322                       | 11                | 124854149    | 124854463   |
| FEZ1-amp7       | 2                | 206                       | 11                | 124861639    | 124861837   |
| FEZ1-amp8       | 1                | 380                       | 11                | 124868858    | 124869230   |
| CIT-amp1        | 1                | 157                       | 12                | 118607114    | 118607263   |
| CIT-amp2        | 1                | 261                       | 12                | 118657454    | 118657707   |
| CIT-amp3        | 1                | 129                       | 12                | 118706271    | 118706392   |
| CIT-amp4        | 2                | 160                       | 12                | 118741727    | 118741879   |

|               |   |     |    |           |            |
|---------------|---|-----|----|-----------|------------|
| CIT-amp5      | 1 | 149 | 12 | 118749387 | 1187499528 |
| CIT-amp6      | 2 | 278 | 12 | 118757674 | 118757944  |
| MAP1A-amp1    | 1 | 184 | 15 | 41593636  | 41593812   |
| MAP1A-amp2    | 1 | 119 | 15 | 41605408  | 41605519   |
| MAP1A-amp3    | 1 | 200 | 15 | 41613691  | 41613883   |
| NDE1_newamp1  | 3 | 136 | 16 | 15609449  | 15609577   |
| NDE1_newamp2  | 3 | 278 | 16 | 15635551  | 15635821   |
| NDE1_newamp3  | 3 | 169 | 16 | 15644878  | 15645039   |
| NDE1_newamp4  | 3 | 114 | 16 | 15647533  | 15647639   |
| NDE1_amp1     | 2 | 175 | 16 | 15654809  | 15654976   |
| NDE1_newamp5  | 3 | 126 | 16 | 15660353  | 15660471   |
| NDE1_amp2     | 2 | 130 | 16 | 15672367  | 15672489   |
| NDE1_amp3     | 2 | 197 | 16 | 15688685  | 15688874   |
| NDE1_amp4     | 2 | 212 | 16 | 15705794  | 15705998   |
| NDE1_amp5     | 2 | 231 | 16 | 15723744  | 15723967   |
| NDE1_newamp6  | 3 | 131 | 16 | 15732225  | 15732348   |
| NDE1_newamp7  | 3 | 319 | 16 | 15777281  | 15777592   |
| NDE1_newamp8  | 3 | 344 | 16 | 15795649  | 15795985   |
| NDE1_newamp9  | 3 | 237 | 16 | 15871187  | 15871416   |
| LIS1-amp1     | 1 | 105 | 17 | 2445178   | 2445275    |
| LIS1-amp2     | 1 | 166 | 17 | 2475148   | 2475306    |
| LIS1-amp3     | 2 | 143 | 17 | 2516285   | 2516420    |
| LIS1-amp4     | 2 | 269 | 17 | 2523985   | 2524246    |
| LIS1-amp5     | 1 | 214 | 17 | 2532543   | 2532749    |
| NDEL1_newamp1 | 3 | 212 | 17 | 8215465   | 8215669    |
| NDEL1_newamp2 | 3 | 300 | 17 | 8232211   | 8232503    |
| NDEL1-amp1    | 1 | 356 | 17 | 8274349   | 8274697    |
| NDEL1-amp2    | 2 | 112 | 17 | 8281156   | 8281260    |
| NDEL1-amp3    | 1 | 209 | 17 | 8289799   | 8290000    |
| NDEL1-amp4    | 1 | 370 | 17 | 8303960   | 8304322    |
| NDEL1-amp5    | 2 | 154 | 17 | 8314409   | 8314555    |
| NDEL1-amp6    | 1 | 190 | 17 | 8318721   | 8318903    |
| NDEL1_newamp3 | 3 | 289 | 17 | 8356486   | 8356767    |
| NDEL1_newamp4 | 3 | 352 | 17 | 8397206   | 8397550    |
| NDEL1_newamp5 | 3 | 147 | 17 | 8452462   | 8452601    |
| REF-amp1      | 2 | 107 | 1  | 68612850  | 68612949   |
| REF-amp2      | 1 | 363 | 1  | 68642496  | 68642851   |
| REF-amp3      | 2 | 190 | 1  | 68666286  | 68666468   |
| REF-amp4      | 1 | 333 | 2  | 51687092  | 51687417   |
| REF-amp5      | 1 | 222 | 2  | 234209391 | 234209605  |
| REF-amp6      | 2 | 285 | 2  | 234287183 | 234287460  |
| REF-amp7      | 2 | 217 | 2  | 234316574 | 234316783  |
| REF-amp8      | 2 | 299 | 4  | 118632190 | 118632481  |
| REF-amp9      | 1 | 253 | 4  | 118656603 | 118656848  |
| REF-amp10     | 2 | 148 | 4  | 118657657 | 118657797  |
| REF-amp11     | 2 | 117 | 7  | 27094760  | 27094869   |

|           |   |     |    |           |           |
|-----------|---|-----|----|-----------|-----------|
| REF-amp12 | 1 | 312 | 7  | 126370670 | 126370974 |
| REF-amp13 | 1 | 398 | 7  | 126399118 | 126399508 |
| REF-amp14 | 2 | 255 | 7  | 126477600 | 126477847 |
| REF-amp15 | 2 | 290 | 7  | 126499872 | 126500154 |
| REF-amp16 | 1 | 409 | 7  | 126614296 | 126614697 |
| REF-amp17 | 2 | 238 | 8  | 119028304 | 119028534 |
| REF-amp18 | 1 | 305 | 12 | 38644450  | 38644747  |
| REF-amp19 | 2 | 315 | 12 | 38783300  | 38783607  |
| REF-amp20 | 1 | 345 | 12 | 38906553  | 38906890  |
| REF-amp21 | 2 | 102 | 18 | 23871228  | 23871322  |

**Supplementary Table S1: Positions selected from UCSC database for amplicons used for MAQ analysis.** All numbering is based on the UCSC Genome Browser March 2006; hg18 (NCBI Build 36.1). The first 79 amplicons listed are the target amplicons and the last 21 in the list are the reference (REF) amplicons.
