# Supplementary material
Source: PubMed Central journal article supplement (PMC4996029)
Supplement: mnp-0001-0175-s02.pdf [file mnp-0001-0175-s02.pdf]

| SNP*       | Chr | Location** | Amp size | Forward PCR primer                    | Reverse PCR primer                    | Extension primer                 |
|------------|-----|------------|----------|---------------------------------------|---------------------------------------|----------------------------------|
| rs1025527  | 1   | 229816468  | 96       | 5'-ACGTTGGATGTCAGTTGTTTTGATAGAGGG-3'  | 5'-ACGTTGGATGCTTTATCACCAGCCTGGTTC-3'  | 5'-TTGTTTTGATAGAGGGGTAGGC-3'     |
| rs10864685 | 1   | 229802898  | 109      | 5'-ACGTTGGATGCCGATGGAAAAGAGCTGATG-3'  | 5'-ACGTTGGATGTTTGCGGCTCTTACAATAC-3'   | 5'-GGAAAAGAGCTGATGTAATTTA-3'     |
| rs11122324 | 1   | 229925804  | 101      | 5'-ACGTTGGATGGTTCTGCACAAAAGAGTAAGG-3' | 5'-ACGTTGGATGCGATGATCTTCTCCCTTGC-3'   | 5'-TGCACAAAAGAGTAAGGTCGTAG-3'    |
| rs1417585  | 1   | 229870227  | 108      | 5'-ACGTTGGATGGCCCAGCTAAGTATGTACAG-3'  | 5'-ACGTTGGATGTCCATTGTTGCCAATGTTAC-3'  | 5'-TAAGACCTCAATAAAGTAGTTTT-3'    |
| rs1612154  | 1   | 229791491  | 96       | 5'-ACGTTGGATGTTTCCACAAGTGTACCTCG-3'   | 5'-ACGTTGGATGTGTTGCTCAGAAGGACACAG-3'  | 5'-aaaggGCTACCTCGGGGGTCTTGG-3'   |
| rs3738398  | 1   | 229828963  | 99       | 5'-ACGTTGGATGACACACACGCTGCTGGAG-3'    | 5'-ACGTTGGATGGCAAACCTTTCTGAGGTCCTG-3' | 5'-CCCTCACAGCCTGTCTC-3'          |
| rs4366301  | 1   | 229872909  | 118      | 5'-ACGTTGGATGTGAGCCTTAAGGTGTTCCAC-3'  | 5'-ACGTTGGATGATATTTGACATTTGTATAGC-3'  | 5'-ATTGTATGGAAAAGGCTTTGGTAAAC-3' |
| rs4658879  | 1   | 229809198  | 107      | 5'-ACGTTGGATGTTTATTTGCCTCCCAGTACC-3'  | 5'-ACGTTGGATGAGCCCTGCTAACTGCAATAC-3'  | 5'-GCCTCCCAGTACCTAGGTAT-3'       |
| rs6541280  | 1   | 229821502  | 92       | 5'-ACGTTGGATGCTAGGATAACATCCTTTGGC-3'  | 5'-ACGTTGGATGGCCTGGAAATAGGAAGTTGG-3'  | 5'-TGGCATGGCCACTATCTGAT-3'       |
| rs6541281  | 1   | 229879757  | 103      | 5'-ACGTTGGATGTGGAATTTCCAGCACAGTC-3'   | 5'-ACGTTGGATGCAGATTTTCTCCACAAAG-3'    | 5'-gggAGCACAGTCTTAAAAAGAGA-3'    |
| rs6674294  | 1   | 229805008  | 118      | 5'-ACGTTGGATGGAAGACTATGAAAAAATGAG-3'  | 5'-ACGTTGGATGTTCTGCTTAGTCTGCTTGCC-3'  | 5'-cctcTGAAAAAATGAGTCATGCATA-3'  |
| rs6691979  | 1   | 229927305  | 102      | 5'-ACGTTGGATGGCCAGTCCCATTTAACCAG-3'   | 5'-ACGTTGGATGACATGGACAACAAGAGCAC-3'   | 5'-CTGGCTTTCTACAGG-3'            |
| rs823161   | 1   | 229841640  | 120      | 5'-ACGTTGGATGCTAAAGGAGCCTCCATCTAC-3'  | 5'-ACGTTGGATGGTCCCCTAAATCCACTCAA-3'   | 5'-GCCTCCATCTACACATTTTC-3'       |
| rs892356   | 1   | 229813573  | 112      | 5'-ACGTTGGATGTAGTTGGTACAGATTCCCCG-3'  | 5'-ACGTTGGATGAATGCCAGGCTAACTAAGGG-3'  | 5'-ctccGCTTCAGAATCTTTAATGGC-3'   |
| rs2812389  | 1   | 229977634  | 102      | 5'-ACGTTGGATGTTTGTTCGTGGACAACGAC-3'   | 5'-ACGTTGGATGTCCACCAGTGATACATCCAG-3'  | 5'-gCGTGGACAACGACCCAACA-3'       |
| rs17283846 | 16  | 15698108   | 115      | 5'-ACGTTGGATGAGTCCAAACTCGCTTCTGC-3'   | 5'-ACGTTGGATGATCTCTGTTCTTGTCTCC-3'    | 5'-GCTTCTGCGGAACCTCGTGA-3'       |
| rs2075511  | 16  | 15725642   | 99       | 5'-ACGTTGGATGGCCTGTTCTTGGTCTTTCC-3'   | 5'-ACGTTGGATGAAGGAGATCGAGAACCCTCAC-3' | 5'-TCTTGGTCTTTTCCAGTTTATCATA-3'  |
| rs11650137 | 17  | 8317926    | 102      | 5'-ACGTTGGATGAAGCTCACTGCTGGGTTAGG-3'  | 5'-ACGTTGGATGGCATCTTCAATGCGTGTCTG-3'  | 5'-ACATTTTCAGGGGTCCAG-3'         |
| rs1391768  | 17  | 8281591    | 92       | 5'-ACGTTGGATGGATCATAAACACGGTCTCTC-3'  | 5'-ACGTTGGATGCGTAAGTTTCTGAGCACTCC-3'  | 5'-gggTGATTCTATCAGACTTCTTTTT-3'  |
| rs17806986 | 17  | 8270769    | 100      | 5'-ACGTTGGATGAAGTCCACAGTTAAGGGAGC-3'  | 5'-ACGTTGGATGAACTTGATACCCTGCCATGC-3'  | 5'-ggTGGGAAGAAATTAGGACCA-3'      |
| rs3817003  | 17  | 8304349    | 98       | 5'-ACGTTGGATGCATGGGGACTAGAGGACAAC-3'  | 5'-ACGTTGGATGTTGACAAACCTTCCCGAAGC-3'  | 5'-ttggcCTAGAGGACAACAACAGA-3'    |
| rs4791707  | 17  | 8306888    | 112      | 5'-ACGTTGGATGTGCATCTGAAGTTTTCAGCGG-3' | 5'-ACGTTGGATGGGGAGAGACATCATCAAAG-3'   | 5'-AGTTTCAGCGGGTGGGAAG-3'        |
| rs7207330  | 17  | 8293861    | 96       | 5'-ACGTTGGATGTCATCTGTTGGATGGACATCG-3' | 5'-ACGTTGGATGTTGGACACCCATGTTACAG-3'   | 5'-aTCCCATCTCTTGCTATTG-3'        |
| rs8077982  | 17  | 8303306    | 100      | 5'-ACGTTGGATGTTCTTTTCCGAGAAGGAGGG-3'  | 5'-ACGTTGGATGTCCACACACTCACACTTAC-3'   | 5'-GGGCAAAGTGTATGGGAAAGAG-3'     |
| rs961      | 17  | 8319657    | 97       | 5'-ACGTTGGATGCTTAGGTACAATTGCTCCCC-3'  | 5'-ACGTTGGATGGCAATGATGAAACAATCTG-3'   | 5'-AATTGCTCCCTTTTTATATA-3'       |

**Supplementary Table SII: Primer sequences and chromosomal location of the SNPs typed for allelic quantification.** \*The first 15 SNPs are located in the *DISC1* duplication, the next 2 in the *NDE1* duplication and the next 8 in the *NDEL1* duplication. \*\*Basepair positions are based on the UCSC Genome Browser March 2006; hg18 (NCBI Build 36.1).
